# Supplementary material for: A tunable method for nonwetting surfaces based on nanoimprint lithography and hydrothermal growth
Source: Royal Society of Chemistry journal article supplement (doi:10.1039/c3ta10754j), 2013-01-01
Supplement: c3ta10754j.pdf [file c3ta10754j.pdf]

## Electronic Supplementary Information

# Tunable method for nonwetting surfaces based on nanoimprint lithography and hydrothermal growth

Hak-Jong Choi,<sup>a</sup> Ju-Hyeon Shin,<sup>a</sup> Soyoung Choo,<sup>a</sup> Jinseung Kim<sup>a</sup> and Heon Lee\*<sup>a</sup>

Department of Materials Science and Engineering,  
Korea University, 5-1 Anam-dong,  
Seongbuk-gu, Seoul, 136-701, Republic of Korea,  
Fax: +82232903284; Tel: +82232903284;  
E-mail: [heonlee@korea.ac.kr](mailto:heonlee@korea.ac.kr)

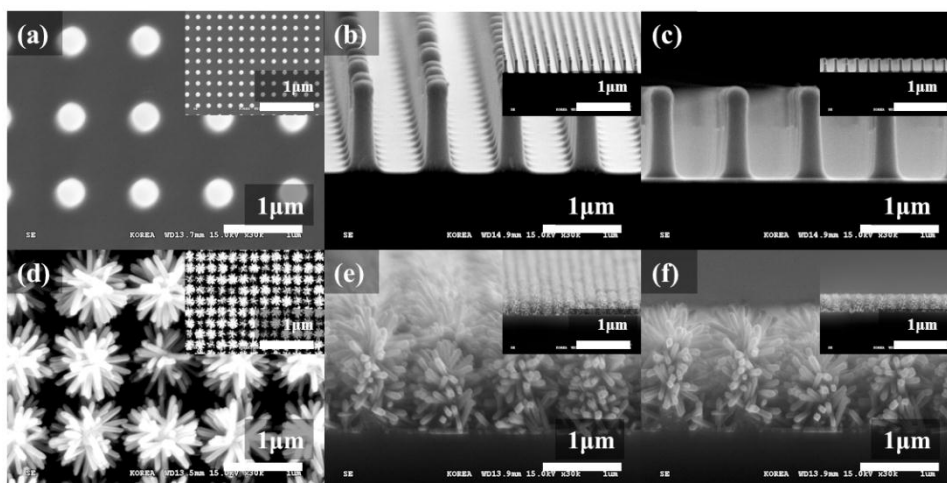

Figure S1. SEM micrograph of pillar-shaped  $\text{TiO}_2$  micro structure and hierarchical structure: (a), (d) top-view, (c), (e) tilted-view, and (c), (f) cross-sectional view.

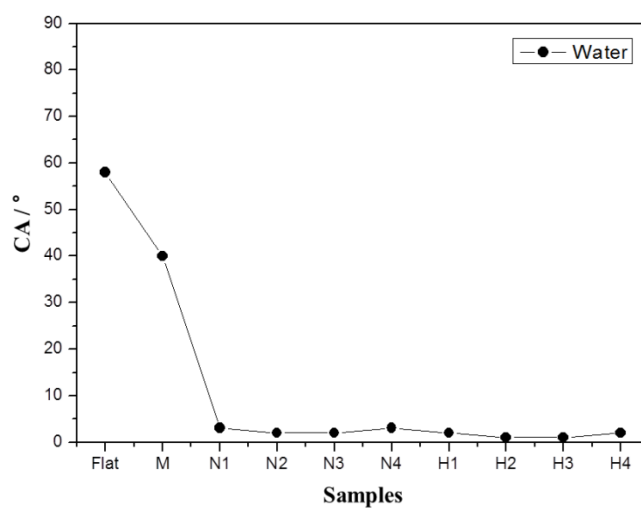

Figure S2. Contact angle of 10 kinds of unmodified-TiO<sub>2</sub> structure for water.

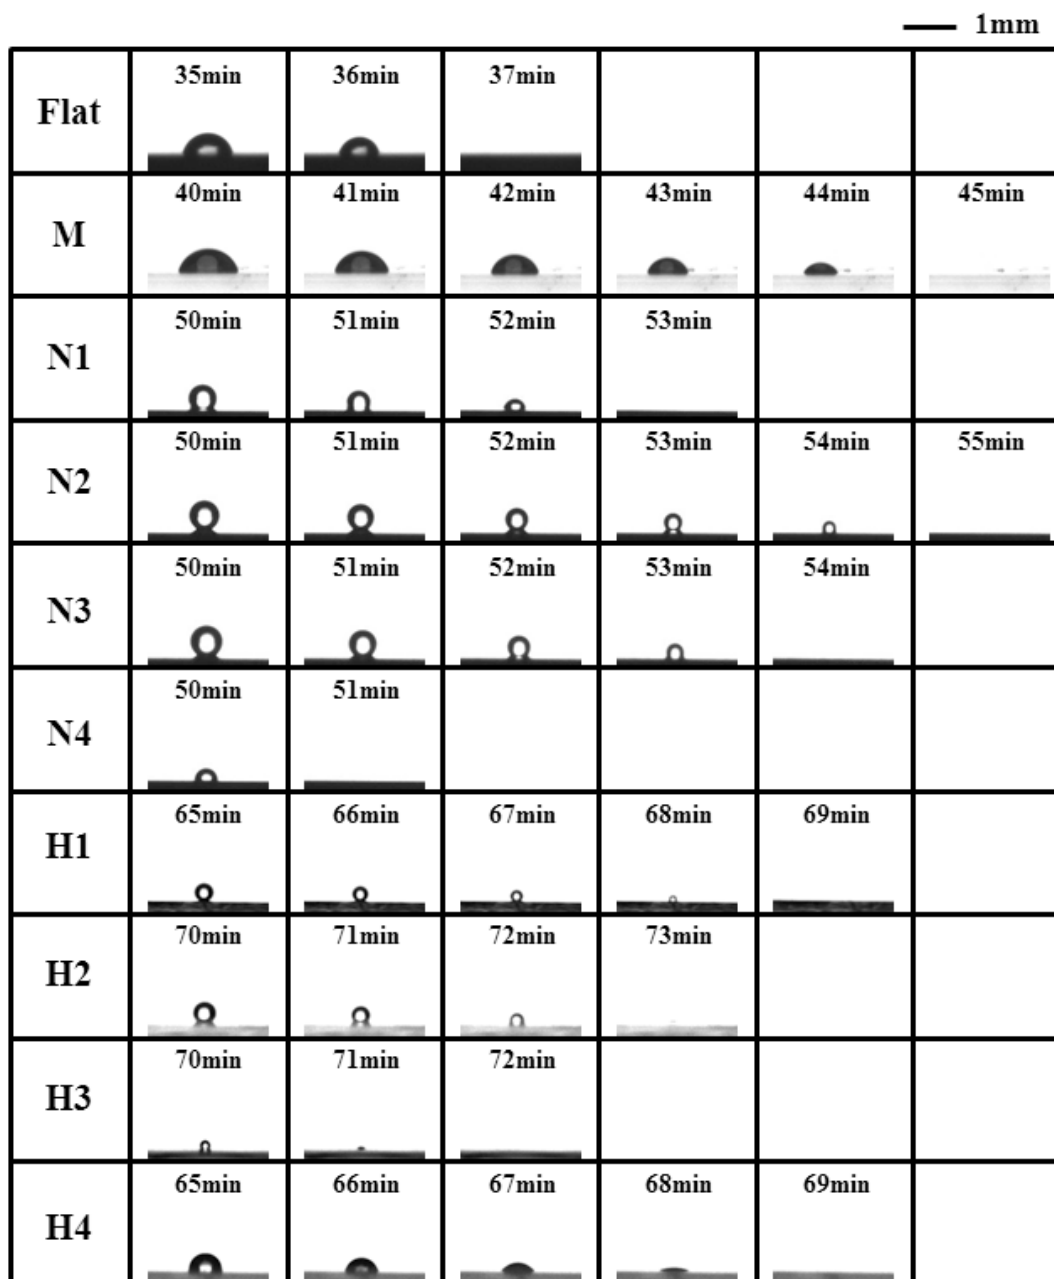

Figure S3. Variations in water droplets on 10 kinds of TiO<sub>2</sub> structures before complete evaporation.
